# Supplementary material for: Characterization of Endogenous Levels of Brassinosteroids and Related Genes in Grapevines
Source: MDPI journal article supplement (doi:10.3390/ijms23031827), 2022-02-05
Supplement: s1 [file s1]

**Table S1. Endogenous content of brassinosteroids (pmol/g DW) in different tissues of cv. Cabernet sauvignon grapevines throughout development.** Quantification of different brassinosteroid metabolites by UHPLC-MS/MS is shown. Mean  $\pm$  standard deviation of three biological and three technical replicates are tabulated. Each biological replicate corresponds to a pool of tissue collected from five different plants.

[illegible]



**Table S3. Genic model for putative genes involved in BRs biosynthesis pathway in grapevines.** The code (ID), primer sequence, Tm and efficiency of primers for RT-qPCR and size of fragment amplified by PCR are shown.

| Gene              | ID                 | Primer sequence (5'-3')                                      | TM (°C) | Ef (%) | Size (bp) | Reference |
|-------------------|--------------------|--------------------------------------------------------------|---------|--------|-----------|-----------|
| <i>VviCPD</i>     | VIT_213s0067g00660 | Fw: GACCAGCCGGATCTTACTTATGG<br>Rv: TTCTCAGAGACTCAGTCCACTCC   | 58      | 100    | 107       | This work |
| <i>VviDET2.1</i>  | VIT_213s0067g01830 | Fw: CACTACAGCTCTTACCATCCATT<br>Rv: CCATAAACCCCTTGAGCAATGTG   | 62      | 91.7   | 167       | This work |
| <i>VviDET2.2</i>  | VIT_219s0014g00080 | Fw: GCCCTTTTCCCAGATGAGAG<br>Rv: GAGATAACAATGGCAGCATCG        | 62      | 96     | 140       | This work |
| <i>VviDWF4</i>    | VIT_204s0023g01630 | Fw: GAGCTGAAGATGGAAGAGAGGA<br>Rv: AGCAAAGAGCAAGCTCAGTACC     | 58      | 99.2   | 147       | This work |
| <i>VviROT3</i>    | VIT_204s0023g02650 | Fw: AGGCAGCTAGTGTCAACAACAA<br>Rv: GACGGTGATGGGTAACCTCTTCC    | 57      | 98.6   | 200       | This work |
| <i>VviCYP90D1</i> | VIT_209s0002g02080 | Fw: GACTGGCCTTATCAGTTCAACCC<br>Rv: CCACCCACCTGAATTGAGTAACA   | 57      | 93.8   | 166       | This work |
| <i>VviBR6OX1</i>  | VIT_214s0083g01110 | Fw: GGGGAGACCACTGAGTTTCTTA<br>Rv: TCTAACATGGACTGTGGGTAGC     | 58      | 99.8   | 191       | This work |
| <i>VviBR6OX2</i>  | VIT_201s0011g00190 | Fw: GATAAGCTGGTGGGAAGGAACACT<br>Rv: TAGCCTAACATGTCATCTTGGGTC | 58      | 102    | 158       | This work |
| <i>VviBR11</i>    | VIT_207s0031g01850 | Fw: GGGTCTTTGATTTTCTGGACC<br>Rv: TGTCCCTTGAAGCCTATTGTAG      | 58      | 103.6  | 192       | This work |
| <i>VviBIN2.1</i>  | VIT_210s0003g01480 | Fw: GGTCTTGAAGCACTACAGCAAC<br>Rv: TCAAATCCCTATGGCAAACCTCC    | 58      | 101.9  | 128       | This work |
| <i>VviBIN2.2</i>  | VIT_212s0028g01810 | Fw: CCATCAGTTACATGGCAGAGC<br>Rv: TTCAGGGTGACCACATTTGG        | 62      | 99.3   | 181       | This work |
| <i>VviBIN2.3</i>  | VIT_214s0060g00600 | Fw: CAATAAGTTACATGGCTGAGCG<br>Rv: CTTCAAGGAGACAACATTAGGGT    | 56      | 104    | 182       | This work |
| <i>VviBES1</i>    | VIT_204s0023g01250 | Fw: CAAGTCCTGTACCCTCTTACCA<br>Rv: CCGCTTTGAACCTCTCGAAGTA     | 56      | 100.4  | 129       | This work |
| <i>VviBZR1</i>    | VIT_218s0001g12020 | Fw: CTATCGTCTTCCAAAACACTGCG<br>Rv: GGAAGTTCTTGCAATCTCAGTT    | 56      | 97.9   | 142       | This work |
| <i>VviUBI</i>     | VIT_216s0098g01190 | Fw: TCTGAGGCTTCGTGGTGGTA<br>Rv: AGGCGTGCATAACATTTGCG         | 55      | 99     | 99        | [48,49]   |

**Table S4. CDS FASTA sequences for gene selected coding for BRs pathways in grapevines.**

> *VviCPD\_VIT\_213s0067g00660*

ATGAAGGGTAATCTCCACAAAAAATGCATTCCCTCACCATGAGTTTCGGTAATTCTTCCATCATCAAG  
GACCACTTGCTGCTCGACATCGACCGCTTGATCCGCTTCAACATGGACTCATGGACCAGCCGGATCTTA  
CTTATGGAAGAGGGCCAAGAAGATAACATTTCGATTTGACAGTGAAGCAGCTGATGAGCTTTGATCCAGG  
GGAGTGGACTGAGTCTCTGAGAAAAGAATATGTGCTTGTGATTGAAGGCTTCTTTACCGTCCCTTTCCC  
TCTCTTCTCCGCCACCTACCGCAGAGCCATCCAAGCAAGGACGAAGGTAGCAGAGGCACTGAACCTGG  
TAGTGAGGGAAAGGAGGAAAGCCAAGGAAGAAGGAGAAGAGGAGAAGAAGAACGACATGCTGGCC  
GCCCTCCTCGACAGCGGCGATAACTTCTCCGACGAGCAGATCGTGGATTTTCATCTGGCCCTGCTGGTG  
GCTGGCTACGAGACCACCTCCACCATCATGACCTCGCGATCAAGTTCCTCACAGAGACCCCTCTCGC  
CTTGGCTCAGCTCAGGGAGGAGCATGACGAGATTAGGGCAAGGATAAGTGACCCTAATGTTCTGGAAT  
GGAGTGATTATAAATCCATGCCTTTCACTCAATGTGTTGTGAATGAGACTTTGAGGGTGGCAAACATA  
ATAGGTGGGATTTTCAGGCGAGTAACCACTGACATCCATGTCAAAGGTTACACAATTCCTAAGGGATG  
GAAGGTGTTTGCATCATTTTCGAGCTGTACACCTGGACCATGAATACTTCAAGGATGCTCGTACTTTTAA  
TCCCTGGAGATGGCAGAATAATTCTGGACCCACGGTTCAGGGAGTGGTGTGAATGTGTTACACCAT  
TTGGAGGAGGGCCGCGCCTGTGCCCTGGCTATGAGCTTGCAAGGGTGGTGTCTCGGTTTTCTTCACC  
GCATGGTCACTCGATACAGCTGGGCTCCTGCAGAGGAGGATAAGTTGGTGTCTTTTCCAACCACTAGG  
ACTCAGAAGCGATACCCCATCAATGTGGAGAGGCGAAAAGTGTATCCGCCGCAGAAAAAGGTGAGG  
GATGA

> *VviDET2.1\_VIT\_213s0067g01830*

ATGGGAATTAATCTTCAGTATTCCAAATTATGGAATCCTAATTCCAAGAGAATCAAAGTCTCCAGCAG  
AACGGGGATGCTTCTACTGTACACTCCGGCCTTTCTGGTGGGTTTTGCTTCCTTTTGGATTTTCCCAGAA  
AAAGGTTTCCGACCTCTGTTGGTCACTACAGCTCTTACCATCCATTTCTTCAAGAGAGTTTTGGAGGTG  
CTGTTTGTACACAAATACAGTGGTGGCATGGTCTTGGATTCTATCATTCTCATCTCTTCTGGCTATTCTA  
CCACCACTGCAACCATGATCCATGCCAACACATTGCTCAAGGGTTTATGGAGCCAGCAATTGATCTC  
AAATGCCCTGGGATTCTACTGTTTTTCAGTGGGAATTTGTGGTAATTTTACCACCACTACCTCCTTTCCA  
AACTAAGGGGAAAAGGTGAGAAAGGCTACAAAATTCCAAAAGGGGGTCTCTTTCACCAAGTTATATG  
CCCACACTATCTTTTTGAGATTCTAGAGTTTGTGGGGTATTCTTCATCTCTCAAACACTCTATTCATTA  
TCCTTCACAATAAGCACAACTTTGTACTTGATTGGAAGGAGTTATGCTACTAGGAAATGGTACATATCC  
AAATTTGAGAATTTCCCTAGGGAGACCAAGGCTCTAATTCCATACATTTTCTAG

> *VviDET2.2\_VIT\_219s0014g00080*

ATGTCAGTGGTGAGTTTTGCATCAATGGCAAATGCAGGGCTATCAGAGTTGAAAGGAAAACACATGG  
AATACTCCAAGTTCTGGGAGCTCAAGTCTGGGAGAAAGTACAAAGTGGATAGTAGAACAGGCATGAT  
CGTGTGTTATACTCCAGCATTTCTTGCTGGTGTGGCCTCTTTTGCCCTTTTCCCAGATGAGAGTTTCAGG  
TTTTTGCTGCTCACTTCGGCTCTCTCCATCCACTTCTTCAAGAGGATATTTGAGGTGCTATTTGTTTACA  
AATACAGTGGTGGGATGGCTCTCGATGCTGCCATTGTTATCTCTCTTAGCTACTTCATCTCTACTGCAA  
CTATGATCTATGCCAACACCTCTCTCGAGATTTTCCGGAGCCGCTAATGGATCTCAAGTATCCAGGAA  
TGGCCAAGGGTGAGAGAGAGTATAAGATTCCCAAGGGCACAGCCTTGATTTGATGGGAAGAAGTTA  
TTCTACTAGGAGATGGTATGTTTCCAAGTTTGAAAACCTTTCCCAATAATGTCAAGGCGCTTATTCCATA  
CATTCTCTAA

> *VviDWF4\_VIT\_204s0023g01630*

ATGTCTGACTTGGAGTTTTTCTCCTCCTCCTTGCGTCAATCTCAGTTCCCCTTGTGATTCTCAATCTGA  
TCAAAAGAAAGCAAAGCGGACTTAATCTACCTCCGGGAAACACGGGTTGGCCTTTTCTGGGTGAAACC  
ATCGGCTATTTAAAGCCGTACTCGGCCACTTCAATAGGAGACTTCATGGAGCAACACATATCAAGGTT  
CGGAGAAATCTACAAGTCCAATCTGTTTGGCGAGCCAACCATAGTCTCAGCGGATTCTGGGCTGAACA  
GATTCATACTACAGAACGAAGGAAAATTGTTTGAATGCAGCTATCCCAGAAGCATAGGTGGAATTCTT  
GGGAAATGGTCCATGCTGGTTTTAGTTGGAGACATGCATAGAGACATGAGAACCATCTCCCTCAACTT  
CTTGAGCCATGGCAGGCTTAGGACTCATCTCCTACCAGAGGTGGTGAAGCACACTTTGCTTGTCTAAG  
CTCTTGGAAGGAGAATTGTACATTTTCTGCTCAAGATGAAGCTAAGAAGTTTACCTTCAATCTGATGGC  
AAAACATATCATGAGCTTGATCCCGGAAAGCCGGAGACTGAGCAGCTTAAGAAAGAGTATGTTACTT  
TCATGAAAGGAGTGGTATCTGCTCCTTTGAATTTCCCTGGAAGTGCATACAGAAAAGCCCTACAGTCTC  
GGTCCACCATCTTAAAATTTATCGAGCTGAAGATGGAAGAGAGGATTCAGAAACTGAGGGGAGGAGG

GT TTGAGAATATGGAGGATGACGATCTTCTTGGATGGGTGCTGAAGCATTCCAACCTTTCAACTGAGC  
AAATCCTGGACTTGGTACTGAGCTTGCTCTTTGCTGGCCATGAACTTCATCAGTAGCAATAGCTTTAG  
CTATCTACTTCTTGAAGGCTGTCCCAACGCCGTTCAACAGCTAAGAGAAGAACACCTTGAAATTTCC  
AGGGCCAAGAAGCAATCAGGAGAGTTGGAATTGAGTTGGGAAGACTACAAAAAATGGAATTCACTC  
AATGTGTTATTAGTGAGACACTGAGGCTTGGAATGTGGTTAGGTTTCTACACAGAAAGGCCCTGAAA  
GATGTCCGGTACAAAGGGTATGACATTCCATGTGGGTGGAAAGTGCTTCCGGTGATTGCAGCAGTGCA  
CTTGGATCCTTCCCTTTTCGACCAACCTCAACACTTCAATCCTTGGAGATGGCAGCAGAATAATGGTAA  
CCGAGGAAATTCGACTAGCTGGAGCACAGCCACGAATCAAACTTCATGCCATTTGGGGGAGGACCA  
CGGCTATGTGCGGGCTCTGAATTGGCCAACTGGAAATGGCGGTGTTTCATCCACCATTTGGTTCTCAAC  
TACAACTGGGAGTTGGTTGATAAGGATCAGGCTTTTGCCTTCCCATTCGTGATTTTCCGAAGGGCCTA  
CCCATCAAGGTCCGACACCACAATTTACGTGA

> *VviROT3\_VIT\_204s0023g02650*

ATGGAGGTGATTCAATTGGTGTGGGTGTGGTGGGTGTTGTGATGGGGTGGTGTGGTATAAGAGCAT  
CAAGAACAAGGCGAAGGAGGAGGGAAGTGGGGTCCGAGAGGAAACCCTGGTTGGCCAGTAATAGG  
AGAGACTCTTGACTTCATTGCTTCTGGTTGGAGCTCTCGACCAGTCAGCTTCATGGAGAAGCGCAAGTC  
TCGATATGGGAAGGTGTTCAAGACAAACATATTGGGAAGCCGGTGATAGTGTGACGGATCCGGAG  
GTGAACAAGGTGGTTCTGCAGAACATTGGGAATGTATTTATCCCTGCCTATCCCCAAACCATCACGGA  
GATACTTGGAGAATCATCTATACTCCAGATGAACGGCAGTCTGCAGAAGAGAGTGCATGCACTGCTTG  
GTGGCTTCTTGAGATCACCACAACCTCAAAGCTCGAATCACCCGTGACATTGAACGCTATGTCAAACCTC  
ACCTTGATTCTTGAAAGACCAGCACATTGTTTACGTCCAAGATGAAGTCAGAAAGATCACGTTTGA  
CGTTCTGGTTAGAGTTCTGGTGAGCATTACTCCAGGTGAAGATTTGAACTTTATGAAGAGAGAATTTCG  
CAGAAGTCATCAAAGGCTTGATTTGTCTCCCAATTAACTTCCCGGAAGTAGACTATATAAATCTCTCA  
AGGCTAAGGAGAGGCTGTTGAAGCTGGTGAGAAGGATCGTGGAGGAGAGGAAGGCAGCCATGGATA  
GAGGTGATCATGAGACCCTCAAGGGTCCACCCAACGATGCCGTGGACGTGCTGCTCCGTGACACAGGG  
GATTCATCTGAGACGTGCGCTCTGTGCTTGGATTTTCATCAGTTCGAATATGATCGAGATGATGATCCCC  
GGGGAGGAGACTCTGCCGACCGCCATGACCCTGGCCGTCAAATTTCTAAGTGACTGCCCCGTGCTCT  
GAACCAGCTGATGGAGGAGAACATGGAGTTAAAGAAGGGAAAGGCTCTTCCGGGGAGGATTATGCC  
TGGACTGACTACATGTGCTTGCCATTTACTCAAATGTGATCAATGAACTCTGAGAATGGCAAATAT  
CATAAATGCGGTTTGGAGAAAAGCTGTTAAAGATGTCAAATCAAAGATTACCTGATACCAGAGGGA  
TGGGGTGTGATGGCATCTTTCACTTCCATTACATGGATGAAGAGAATTATGAAAACCCTTATCAGTTC  
AATCCATGGAGATGGGAGAAGGCAGCTAGTGTCAACAACAACATAGCTATACACCCTTCGGAGGTG  
GACAGAGGCTGTGCCCTGGTTTAGAATTATCGAACTCGAAATCTCAATTTTTCTTCATCATCTCGTCA  
CCACCTACCGGTGGGTGGCTAAGAAGGACGACGTAGTTTACTTTCCAACAGTGAAGATGAGGAAGAA  
GTTACCATCACCGTCACACCCTTACCACCCCTTGA

> *VviCYP90D1\_VIT\_209s0002g02080*

ATGCACAACCTGTGGATTGTGTTTTTGACAGCCATCTTCTTGTCACCATAATTCTTCTCTACAGAAAC  
AGATCTAGAATCAGATCATCACCAAGCTCATCACTTCCTCTAGGAACTCTTGGATGGCCTCTTATCGGC  
GAAACCCTAGAGTTCATCTCTTGTGCCTACTCAGACCGCCCTGAGAGCTTCATGGAGCGGCGGCTCG  
CATGTATGGAAAGGTGTTCAAGTCTCACATATTTGGGAGCCCAACAATAGTTTCCATTGATGCAGAAG  
TGAGTAGATTTGTGTTGCAGAGTGATTCAAAGGCCTTTGTGCCATCTTACCCTAAATCTCTCACTGAGC  
TGATGGGGCAGTCTCCATTTTGCTCATCAATGGAAGCTTGCAGAGGAGAGTCCATGGACTGATTGGA  
GCCTTCTTCAAATCCCCACATCTCAAAGCTCAAATCACTCAAGAAATGGAGAGTTATATTCAGAAATC  
AATGGGGTCTTGGAGAGATGATCACCCCATTTTCATCCAGGATGAAGCAAAAAATATTGCTTTTCAAG  
TCCTAGTGAAGGCACTGATCAGTTTGAATCCAGGTGAAGAAATGGAGTTTCTAAGAAAAACAGTTCCAG  
GAATTCATCTCAGGCCTCATGTCCTTGCTGTAAACATACCCGGAACAAGGCTTTACAGATCTTTACAG  
GCCAAGAAGAAAATGGTTCAATTAGTAGGAAAAATCATCCAAGAAAGGAGAAATATCAACCAACCCT  
CCAAGGTCCCCAAAGATGTTCTGGATGTTCTCCTCAATGACTCAAGCCAACACTACTGACCGATACCCTCA  
TATCCGATAATATGATCGATCTGATGATTCCTGGAGAGGATTACGTACCAGTTCTCGTGACTCTCGCGA  
TCAAATACCTCTCCGATTGCCCTGCAGCCCTCCAACAACACTGACGGAGGAGAACATGAGACTGAAGAGA  
CTAAAAGCCGAGCGGGGAGAGACGATGACTTGGAGCGATTACTTATCGCTACCATTACGCAGACGGT  
GATCACAGAAACACTAAGGTTGGGAAACGTTATTATAGGGGTGATGAGGAAGGCCATGAAGGATGTG  
GAGATAAAGGGACATAGGATACCAAAGGATGGTGCGTTTTTCGCATATTTTCCGGTCTGTCCATCTTGA  
TGAAAGCCAGTATGACTGGCCTTATCAGTTCAACCCATGGAGGTGGCAAGACAAAAATATTAGCAGTT  
GTAGCTTCACTCCTTTTGGTGGTGGACAAAGGCTGTGTCCAGGGCTTGACTTGGCCAGGCTGGAGGCTT

CAATCTTCCTCCACCACTTTGTTACTCAATTCAGGTGGGTGGCTGAGGATGATTCAATTGTCAACTTCC  
CCACAGTAAGAATGAAGAGAAGGATGCCTGTTTGGGTCAAAAGGAGAAGAGACTACTCTTGA

> *VviBR6OX1\_VIT\_214s0083g01110*

ATGGCTGTTTTTCATGGCGGTTTTTGGTGTGGTTCTTATTGGGCTCTGTATTTGCACTGCTTTGTTGAGAT  
GGAATGAGGTGAGGTACAGGAAGAAAGGATTGCCCCAGGTACAATGGGTTGGCCAGTCTTTGGGGA  
GACCACTGAGTTTCTTAAGCAAGGCCCAAGCTTCATGAAAAACCAGAGAGCAAGGTATGGAAAATTTT  
TCAAATCCCATTATTTGGGTTGTCCTACCACAGTCTCCATGGATCCAGAGCTCAACAGATACATCCTAA  
TGAATGAAGCAAAAGGCCTGGTTCCTGGCTACCCACAGTCCATGTTAGATATCCTGGGAAAAATGCAAC  
ATTGCAGCTGTCCATGGCTCCACTCACAAGTACATGAGAGGGGGCACTTCTAGCTCTCATTAGCCCCACC  
ATGATAAGAGGGCCAGCTTTTTACCAAAGATAGATGAGTTCATGAGATCCCATCTGAACAAATGGGATAC  
CAAAATCATCAACATCCAGGAGAAAACCAAAGAGATGGCACTTCTCTCTTCTCTCAAGCAGATTGCCG  
GTATTGAATCCGGCACAATATCTAAGGAGTTTATGCCAGAGTTTTTCAAGCTGGTGTGGGAACCATTT  
CTCTGCCTATTGACCTTCCTGGCACAATTACCGCCGCGGGTTCCAAGCAAGGAAGAATATTGTTGGC  
ATGTTGAGACAACTCATAGAGGAGAGAAAAGCTTCCCAGGAAACCCACAATGACATGCTTGGTTGCCT  
AATGAGAATAATGAAAATCGATATAAACTAAGCGATGAAGAGATAAATTGATCTCATAATCACAATTC  
TGTATTCCGGGTTACGAGACTGTTTCCACCACCTCCATGATGGCTGTCAAGTATCTCCATGACCACCCAA  
GAGTTCTTGATGAACTCAGAAAAGAACATTTGGCAATCAGGGAAAGGAAAAGGCCAGAGGATCCCAT  
TGACTGGAATGACTACAAGTTGATGCGCTTACCCGAGCTGTGATCTTTGAGACCTCCAGACTGGCTA  
CAATTGTTAATGGGGTTTTGAGGAAAACCACCAAAGACATGGAACCTGAATGGATTTGTGATTCCAAAA  
GGCTGGAGAATATATGTTTATACCAGGGAGATCAACTATGACCCCTTGCTATACCCCGACCCGTTAGC  
TTTCAACCCTTGAGATGGCTGGACAAGAGCTTAGAGTCCCAAACTACTTCCTACTATTTGGAGGAG  
GCACCAGGCAGTGTCCCGGAAAGGAACCTGGGAATAGCTGAAATTTCTACATTCCTTCACTACTTTGTA  
ACAAGATACAGATGGGAAGAAGTTGGGGGAGATAAGCTAATGAAGTTTCCAAGAGTTGAAGCACCAA  
ATGGACTACACATTAGGGTCTCAGCTTACTGA

> *VviBR6OX2\_VIT\_201s0011g00190*

ATGGCTGTTTTTGGTGGTGATCTTTGTTTTGGTTGTGGCTTTATCTGTCTGCTTTGCTCTCTTGAAATGGA  
ATGAGATAAGATACAGCAGGAGAGGGCTGCCTCCTGGGACGATGGGGTGGCCACTCTTTGGTGAGAC  
TACTGACTTCATTAAACAGGGACCTGACTTCATGAAGAAGCAGAGAGCAAGGTACGGGAGCTTTTTCA  
AGACCCACATACTGGGCTGTCCTACCATTATTTCCATGGATCCAGAGCTCAACAGATACGTCCTTTTGA  
ATGAAGGAAAAGGACTTGTTTCCTGGCTACCCACAGTCCATGTTGGATATATTAGGGGAACACAACATT  
GCTGCTGTACAGGGATCGACCCACAAATATATCAGAGGGTCAATGCTATCCCTCATTGCCCCCCCCAT  
GATCAAAGATCAGCTTCTCAGAAAGATTGATCAGGGCATGAGATTCCACCTCAGCAACTGGGATGGCA  
GAACCATTGATATCCAAGAAAAAACCAATGAGATGGCACTGTTTCATTCCCTTCAAGTTGATCATGGAA  
ACTGAATCAGCCTCCATCTATGAGACCTTCAAAAGGGAGTTTGATAAGCTGGTGGAAGGAACACTGTC  
ACTGCCCATCAACATTCTGGCACAAGTTACCATCATGGGTTCCAGGGAAGGAAGAATGTTATTAGAA  
TGTTGAAAGGAGTTATGGAGAAGAGAAGAGCTTCTTCAATGACCCAAGATGACATGTTAGGCTACCTT  
CTTAGGAATGAAGGATCAAAGTATAATCTCAGTGATGAGGAGATACTTGATCAAGTAATAACAATTTT  
GTATTCAAGGATATGAACTGTCTCAACTACTTCCATGATGGCCGTCAAATATCTGCTTGATAATCCGAG  
AGCTCTTCAACAACCTTAGAGAAGAGCATTTAGCGATTTCGACAAAGAAAAAATCCAGAGGATCCAATT  
GACTGGAACGATTACAAGTCCATGAACTTTACTCGAGCCGTGATCTTTGAAACCTCGAGGTTGGCCAC  
AGTCGTGAATGGGGTGCTGAGGAAGACAACAAAAGAAATGGAGTTGAATGGATTTGTGATTCTAGAG  
GGGTGGAGGATATATGTTTACACAAGGGAGATCAACTATGATCCTTTTCTCTATCCAGAGCCATATAC  
CTTCAATCCATGGAGATGGCTGGACAACAGCTTGGAATCTCACAATTACTGCTTCACATTTGGAGGTG  
GAACCAGGCTCTGTCCCGGAAAAGAATTGGGCATAGTTTCAGATTTCTACATTCCTTCACTACTTCCTTA  
CTAGTTATAGGTGGGAAGAAGTGGGGGAGTAACAAGATTGTGAAATTCCCAAGAGTAGAGGCACCAAA  
TGGCCTGCATATAAGGGTGTCCAAGTACTAA

> *VviBR11\_VIT\_207s0031g01850*

ATGGCATGTGAGCTACAGCTACCGGTTTTTCAGAGGACCCAAGATGAAAGCTTTTTCTCGCTCTTACTCT  
CAGACCTACTTGTTTTTCTTGTTTTTGTTTCATGAGTTTTTTGTGTGTGGCTTTAGCGGCGGTTTTCCAAGG  
ATGCGACGCTGTTGTTGAGCTTCAAGAGGTCGCTGCCCAATCCTGGTGTGCTTCAGAACTGGGAGGAG  
GGCAGAGACCCATGTTACTTCACTGGAGTTACGTGCAAGGGCGGGCGAGTATCGTCTCTGGATCTCAC  
CAGCGTGGAGTTGAATGCGGAGCTTCGATACGTGGCTACATTCCCTCATGGGGATTGACCGGTTGGAGT  
TTCTCTCTCTGCAATCCACCAACCTCACTGGAGCTGTCTCGTTCGGTTTCCGGGTCTCGTTGCGGCGCGTT

GCTGAGCTCCCTGGATCTTGCCAACAACACCGTATCTGGGTCGATCTCGGATTTGGAAAATCTGGTGTG  
GTGCTCTTCTTTGAAGTCTCTGAACCTGTCCAGGAACAATCTGGAGTTCACCGCCGGAAGGCGGGATT  
CCGGCGGGGTGTTACCGGTTTGGAGGTGCTGGACCTGTGCAACAACCGTATATCCGGCGAGAATGTG  
GTGGGGTGGATTTTATCCGGCGGGTGTGCTCAGCTGAAAAGCTTGGCCTTGAAGGGGAACAACGCCAA  
TGGAAGTATACCACTCTCTGGGTGTGGAAATTTGGAGTATTTGGACGTTTCTTTCAATAATTTCTCTGC  
GTTTCCATCGCTGGGTCGTTGCTCCGCTCTCAACTATCTGGATCTCTCCGCCAATAAATTTCCGGCGA  
GATTAAGAACCAGCTCGCGTACTGTCAGCAGCTCAACCACCTCAATCTCTCCAGCAACCACTTCACCG  
GCGCGATTCCGGCGCTGCCCCTGCTAATTTGGAGTACGTTTATCTCTCCGGCAACGATTTCCAGGGTG  
GCATACCTCTGCTTCTTGCCGACGCCTGTCCCACTCTCCTCGAGCTCAACCTCTCTCCAACAACCTCTC  
CGGTACGGTCCCGAGCAACTTCCAGTCGTGTTCTTCTCTGGTATCCATTGATATATCTAGAAAACACTT  
CTCCGGCGTTTTGCCGATTGATACTCTTTTGAATGGACCAATTTGAGGAAGCTCTCTTTGTCTTACAA  
CAATTTTGTGCGTTCTTTGCCGGAATCTCTGTCCAAGTTGATGAATTTGGAGACTTTGGATGTGAGTTC  
CAACAATTTTTCGGGTTTGATCCCTTCCGGACTGTGTGGAGATCCAGGAACAGCCTGAAGGAGCTTC  
ATCTTCAGAACAAATTTGTTCACTGGTCGTATACCAGAGGCTCTGAGCAACTGTTCTCAGCTGGTCTCCC  
TTGATCTCAGCTTCAATTACCTCACAGGGACGATCCCCCTCCAGCCTGGGCTCCTTAACCTAAGCTCCAGC  
ATTTGATGCTGTGGTGAATCAGCTCCATGGACAGATCCAGAGGAGCTCATGAACCTCAAAACCCCTC  
GAGAATCTGATTCTAGACTTTAACGAATTGACCGGCCCATCCCTGACGGCCTTAGCAACTGCACCAA  
TTTGAATTGGATCTCCCTTTCAAACAACAGGTTGAGTGGTGAGATTCCCGGGTGGATCGGTAAGCTATC  
CAATCTTGCCATCCTCAAGCTCGGGAACAATTCATTCTACGGTAGCATTCCGCCGGAGCTTGGGGATTG  
TCGCAGTTTGATATGGTTGGATCTCAATACTAATCACTTGACTGGCACCATCCCGCCCGCCCTGTTCAA  
ACAGTCTGGTAATATCGCTGTTGGGCTGGTGACAGGGAAGAGCTATGTGTATATTAGGAATGATGGGA  
GTAAGGAGTGCCATGGAGCTGGGAATTTGCTGGAGTATGGGGGAATCAGAGAGGAGGAGATGGACCG  
TATTTGACTAGGAATCCATGCAACTTCACTAGAGTCTACAAGGGTAGGACAAATCCCACATTCAATC  
ATAACGGGTCTTTGATTTTTCTGGACCTTTCATATAACATGTTGGGAGGTAGCATTCCAAAGGAGTTGG  
GGACTCCTTATTATCTGTATATTCTGAATTTGGCTCATAACAATCTCTCTGGTGCCATTCTGTGGAGCT  
TGGAGGCTTGAAGAATGTTAATATTCTTGATTTCTCCTACAATAGGCTTCAAGGGACAATTCCACAATC  
TCTGTCTGGCCTTTCATGCTGAATGACATTGATCTGTCTAACAACAATCTATCTGGGACGATTCTCTCA  
ATCAGGTCAATTCTTAACGTTTCCGAATTTGAGCTTCGCTAACAATCTGGCCTCTGTGGGTTTCCCCTT  
TCCCCCTGTGGGGGAGGTCCCAACTCGATTTCAAGTACCCAGCATCAGAAATCTCATCGGAGACAAGC  
ATCCCTTGTGGGGAGTGTGGCCATGGGCTTATTGTTCTCCCTGTTTTGCATATTTGGTTTGATCATAGTT  
GCCATTGAGACGAGAAAAAGGAGGAAAAAGAAGGATTCTACTCTTGACGTTTATATTGATAGTAATTC  
CCATTCCGGGCACTGCAAAATGTTAGCTGGAAGCTAACTGGCGCCCGGGAAGCATTGAGCATCAACCTAG  
CCACATTTGAAAAACCCCTTCGGAAGCTCACCTTTGCTGATCTTCTTGAAGCCACCAATGGCTTCCACA  
ATGACAGCCTTATTGGCTCTGGTGGCTTTGGCGATGTGTACAGAGCTCAGCTGAAAGATGGAAGCATA  
GTAGCCATCAAGAAGCTGATACATATAAGCGGACAGGGGGACCGGGAATTCACGGCTGAAATGGAAA  
CCATTGGGAAAATCAAGCACCGAAACCTCGTCCCTCTCTTGGGCTACTGCAAGGTGGGGGAGGAACGG  
CTCTTGGTGTATGAATACATGAGGTTTGGAAAGCCTGGAAGACATCCTACATGACCGGAAAAAGGCTGG  
GATCAAGCTGAATTGGGCAGCTAGGAGGAAGATTGCCATTGGAGCTGCAAGGGGATTAGCCTTCTCTCC  
ACCATAACTGCATCCCCACATCATCCACCGCGACATGAAATCGAGCAACGTCCTGCTTGATGAAAAC  
TTTGAAGCCAGAGTCTCTGACTTCGGAATGGCTAGGCTAATGAGCGCAATGGACACCCATTTGAGTGT  
CAGCACGCTTGCAGGCACCCCGGCTATGTCCCTCCCGAGTACTACCAGAGCTTTAGATGTTCTACAA  
AAGGCGATGTCTACAGTTATGGAGTAGTTCTGCTAGAGCTTCTAACAGGGAAGCAACCAACAGATTCA  
GCTGATTTTGGGGATAACAACCTTGTGGGGTGGGTGAAGCAGCATGCCAACTGAGAATAAGCGATGT  
ATTGATCCTGAGCTCATGAAGGAGGACCCCAACCTGGAGATTGAGCTCTTGCAACACTTAAAGGTAG  
CGTGTGCCTGTTTGGACGATCGGCCATGGCGGCGGCCACCATGATTCAAGTCATGGCGATGTTCAAG  
GAGATCCAAGCAGGGTCTGGGCTGGACTCTGCATCAACCATAGCCACCGAGGATGGAGGCTTCAGTGC  
AGTGGAATGGTAGAAATGAGCATAAAAAGAAGTCCCGGAATTCAGCAAGCAGTAG

> *VviBIN2.1\_VIT\_210s0003g01480*

ATGTCCGACGACAAGGAAATCTCTGCCCTGTTGTTGATGGGAATGATCCTGTCACAGGTCACATCATT  
TCCACCACAATTGGAGGGAAAAATGGGGAGCCCAAACAGACCATCAGTTACATGGCAGAGCGTGTTG  
TGGGTACCGGGTCATTTGGAATTGTTTTTCAGGCAAAATGCTTGAAACTGGAGAGACTGTGGCCATA  
AAGAAGGTTTTGCAGGACAGAAGATATAAGAATCGTGAGCTGCAGTTAATGCGCACGATGGATCATC  
CAAATGTCATTTCCCTAAACATTGTTTCTTTCTACTACAAGTAGAGATGAACTTTCTCAACTTGGT  
AATGGAATATGTCCCTGAGACCATGTATCGGGTCTTGAAGCACTACAGCAACGCAAAACAGCGAATGC  
CTCTTATATATGTGAAACTTTACACTTACCAAATTTTACAGGGGCTGGCATATATCCACAGTGTTCTG

GAGTTTGCCATAGGGATTGAAGCCTCAAAATCTTCTAGTTGATCCACTTACTCACCAAGTTAAGCTTT  
GTGACTTTGGAAGTGCAAAAGTGCTAGTTAAAGGTGAAGCAAACATATCATACATATGTTCTCGTTTC  
TACCGAGCACCTGAACTCATATTTGGGGCCACAGAGTATACAACCTCAATTGATATATGGTCAGCTGG  
TTGTGTCCTAGCTGAGCTTCTTCTAGGCCAGCCATTGTTTCCTGGAGAGAATGCAGTGGACCAGCTTGT  
TGAGATTATCAAGGTTCTTGGTACACCAACGCGGGAAGAAATTCGCTGTATGAATCCGAGTTATACTG  
ATTTTAGGTTTTCCACAGATAAAAGCACACCCTTGGCACAAGGTCTTTCACAAACGAATGCCTCCTGAA  
GCAATCGATCTTGCTTCTCGACTTCTGCAATACTCACCAAGTCTTCGCTGCACAGCTCTAGAAGCATGT  
GCACATCCTTTCTTTGATGAGCTCCGAGAACCCAATGCCCCGCTGCCAAATGGTCGTCCATTACCACCT  
CTCTTCAATTTTAAGCAGGAATTATCTGGGGCTTCTCCTGAGCTTGTTAATAAGTTGATACCGGAGCAT  
GTGAGGAGGCAAATAGGCCTAAGTTTTTTCCACCCAGCAGGCACATAA

> *VviBIN2.2\_VIT\_212s0028g01810*

ATGGCCTCGCTGCCTCTGGGTCCCTCAAACCCACCACCACCACCACCACCTTCCGCCGGAACACGACCC  
TCTCAAACCTCCTTTCCGCCGCCCGGACCACCTCGACTCCGACAAGGAAATGTCAGCTGCTGTTATTGA  
GGGAATGATCCAGTCACTGGTCATATAATTTCCACCACCATTGGAGGCAAAAAATGGAGAGCCTAAAC  
AGACATCAGTTACATGGCAGAGCGCATTGTAGGCACTGGATCGTTTGGAATTGTTTTTCAGGC AAAA  
TGCTTGGAACCTGGAGAACTGTGCAATAAAAAAGGTCTTACAAGACAGGCGGTATAAAAAATCGTG  
AGCTGCAGTTATTGCGCTTGATGGATCACCCAAATGTGGTCACCCTGAAGCACTGCTTCTTTCCACAA  
CAAGTAGAGATGAACTTTTTCTGAATTTGGTAATGGAATATGTTCCCTGAGACTATGTACCGGGTCTTGA  
AGCATTATAGCAATGCTAACCAGAGGATGCCTCTCATATATGTCAAACCTTTATACATATCAAATTTTAA  
GGGGGCTGGCCTATATTCATACAGTGCCTGGGGTTTGCCATAGGGATGTGAAGCCTCAAAATGTTCTG  
GTTGATCCTCTCACCCATCAGGTTAAGCTTTGTGATTTTGGAAGTGCAAAGGTTCTGGTCAAGGGTGAA  
GCAAACATATCATACATTTGTTCTCGCTACTACCGGGCCCCAGAACTTATATTTGGTGCAACTGAATAC  
ACAACATCGATTGATATTTGGTCAGCTGGTTGTGTTTTTGTGAGCTTCTACTAGGCCAGCCCTTGTTTC  
CTGGAGAGAGTGCAGTAGACCAACTTGTTGAAATTATAAAGGTTCTTGGTACTCCAAGTAGAGAAGAA  
ATTCGATGTATGAACCCGAATTATACTGATTTTCAGGTTTCCTCAGATCAAAGCTCATCCTTGGCACAAG  
GTGTTTCACAAACGGATGCCTCCTGAAGCTCTTGATCTTGCTTCACGACTTCTTCAATATTCACCGAGC  
CTTCGCTGCACTGCTTTAGCTGCAGCTTCACCAGAAGTGTGTCATAGGCTGATACCAGAGCATGTCCGC  
CGGCAAGTTGGTCTCAGTTTCCCCCATCCTGCTGGCACGTAA

> *VviBIN2.3\_VIT\_214s0060g00600*

ATGGCTTCAGTGGGCATAGCACCTACCTCTGGTTTGAGAGAACCTAGTGGCCACAATGCCGGTGTTGA  
TAGGTTGCCAGAAGAGATGAATGACATGAAAATTAGGGATGACAAAGAGATGGAAGCAACAGTTGTT  
GACGGTAATGGAACAGAGACAGGTCATATAATTGTGACGACTATTGGTGGTAGAAATGGCCAACCAA  
AGCAGACAATAAGTTACATGGCTGAGCGCGTTGTTGGGCATGGATCATTTGGAGTTGTTTTTCAAGCA  
AAATGCTTAGAGACCGGTGAAACTGTGGCTATAAAGAAGGTTCTTCAAGACAAGAGATATAAGAACC  
GTGAACTTCAAACATATGCGTCTTCTTGACCACCCTAATGTTGTCTCCTTGAAGCACTGTTTCTTTTCAAC  
AACCGBAAAGGATGAACCTTTATCTTAATCTTGTACTTGAGTATGTTCCCTGAAACTGTTTCATCGGGTTAT  
TAAACACTACAATAAGTTGAACCAAAGGATGCCACTGATATATGTGAAGCTCTATACATACCAGATTT  
TCAGGGCATTGTCTTACATTCATCGCAGTATTGGAGTTTGTGCATAGGGACATCAAACCTCAAAATCTTT  
TGTTGAATCCACATACCCACCAGCTTAAGCTATGTGACTTTGGAAGTGCAAAAGTCTTGGTAAAAGGG  
GAACCCAATATATCTTATATCTGCTCTAGATATTACAGGGCTCCTGAGCTTATATTTGGAGCAACTGAG  
TACACTACAGCTATTGATATCTGGTCTGCAGGTTGCGTCTGGCTGAGTTAATGCTTGGACAGCCTCTG  
TTTCTGAGAGAGTGGAGTCGATCAGCTTGTTGAGATTATCAAGGTTTTTGGGCACTCCAACAAGGGA  
GGAAATTAATGCATGAACCCCAACTATACAGAGTTCAAATTTCCCCCAAATTAAGCTCACCCATGGC  
ACAAGATATTCCATAAACGCATGCCTCCAGAAGCTGTTGATTTGGTTTCAAGACTACTGCAGTACTCTC  
CTAATCTACGGTGCACAGCTATGGATGCCTTGACCCATTCTTCTTCGATGAGCTACGTGACTCAAGCA  
CCCGCCTGCCAAATGGCCGATTTCTTCCACCACTATTCAACTTTAAGCCTCACGAATTGAAGGGAGTAC  
CAGTTGAGATTTTGGTGAAATTGATCCCGGAACATGCAAGAAAGCAATGCCCTTCTTGGGCTATGA

> *VviBES1\_VIT\_204s0023g01250*

ATGGCTGGAGGCGGATCATCCGGAAGGTTGCCTACTTGGAAGGAGAGGGAGAACAACAAGAAGAGG  
GAGAGGAGAAGAAGGGCCATAGCTGCTAAGATATACGCGGGGCTTAGAGCTCAGGGCAACTACAAGC  
TTCCAAGCACTGCGATAACAACGAGGTCTTGAAGGCTCTATGTTCTGAGGCTGGTTGGACCGTTGAA  
GAAGATGGCACCACCTACCGCAAGGGATGCAAAACCCCCAACGGAAATTGCAGGCGCTTCGGCCA  
ACATCAGTGCATGTTCTTCCATGCAACCAAGCCCACAGTCCTCATCCTTCCAAGTCTGTACCCTCTT



ACCATGCCAGCCCATCGTCCTCCTCTTTCCCGAGCCCCACTCGGTTTGATGGAAACCCCTCTTCATACC  
TCCTCCCTTTTCCTCCGTAATTTAGCCTCGATTCTTACATCTCTCCCACCTCTTCGAATATCCAACAGTGC  
TCCTGTAACCCCGCCTCTTTCTTCCCCTACTTCGAGAGGTTCAAAGCGGAAACCTGACTGGGAATCCTT  
CTCAAATGGCTCCCTGAATTCCTTCCGCCACCCTCTATTTGCCGTATCAGCCCCCTCTAGTCCTACTCGC  
CGCAACCATCTTACACCTGCCACAATACCGGAATGTGATGAATCTGATGCCTCTACTGTTGATTCTGGT  
CGCTGGGTGAGTTTCCAGACAGTAGCACCCAGGCAGCTCCATCTTCCCCTACATTTAATCTTGTA  
CCAGTGGCTATGGAGTGTTCTATCCCCAATGCAGTTGATGAGCATGGAGGTCTGGGCTGGGGTGCAGC  
AGCAGAGAGGGGCCGCGCCAGAGTTTGAGTTTGAGAGTGGCAGAGTGAAGGCGTGGGAGGGTGAGAG  
AATTCATGAGGTAGGAGTGGATGAACTGGAGCTTACACTTGGGAGTGGGAAGACTCGTGGTTAA

> *VviBZRI\_VIT\_218s0001g12020*

ATGACGTCAGAGAGGACGCCGACGAGGAGGAAGGCGTCGTGGAAGGAGAGGGAGAACAACATGAGG  
AGAGAGAGGAGGAGGAGAGCCATAGCGGCAAAGATATATGCGGGCCTCAGGGCTCAGGGCAACTATC  
GTCTTCCAAAACACTGCGATAACAACGAGGTCCTCAAGGCTCTCTGCTCCGAAGCTGGTTGGACCGTT  
GAAGATGACGGCACCACTATCGCAAGGGATGCAAGCCTCCCCCTCAACTGAGATTGCAGGAACCTC  
CACAAACAACACTCCCTGCTCTTCCAGAAACCAAGCCCACCATCTTCCTCCTTTCCAAGCGCATTTCG  
TTCCTACCAACCCAGTCCCTCATCCTCAAACCTGTCTTTCATGGATGCCAATGCCTCTCTCAATCTCCT  
CCATTTCTCTACAAGTCTATCCCTTCATCTCTGCCTCCTCTCCGAATATCAAACAGTGCTCCTGTAAAC  
CACCTATTTTCGTCCCCAACCTCCAGAGTTCCCATGCCTAAACCCAACCTGGGAGTCCCTTGCCAAAGA  
CCATGGCCTCTATCCATCACCATTACCCCATCTTTGCTGCTTCTGCCCCAGCAAGCCCTTCTCGCTGTCA  
GTATATTGCTCCTGCCACTATACCTGAATATGAGGAGTCTGACACCTCAACTGTTGAGTCAGGCCAGTG  
GGTGAGTTTTTCAGACGTTTGCACGCCATCTTGCTCCATTGCCCCCAACCTTCAATCTTATGAAACCTGT  
GGCTCAGAAAATTTACCAGATGAAGCAACCAAAGAGAAGGGGATAACTCCCGAGTTGGAAATTGGA  
AGTGCACAGGTGAAGCCCTGGGAAGGGGAGAGGATTCATGAGATAGGTTTGGATGATCTGGAGCTTA  
CACTAGGAAGTGGAAGAGTAGGAGTAAAGGCTAA
